# Supplementary material for: Enhanced photovoltaic performance with co-sensitization of quantum dots and an organic dye in dye-sensitized solar cells
Source: Royal Society of Chemistry journal article supplement (doi:10.1039/c4ta03098b), 2014-01-01

## Enhanced Photovoltaic Performance with Co-Sensitization of Quantum Dots and an Organic Dye in Dye-Sensitized Solar Cells

Camilla Lelii, Mounqi G. Bawendi,\* Paolo Biagini,\* Po-Yen Chen, Marcello Crucianelli, Julio M. D'Arcy, Francesco De Angelis, Paula T. Hammond,\* and Riccardo Po

Four novel hybrid CdSe quantum-dots/organic dye materials for dye-sensitized solar cells are presented. The enhancement of the efficiency in the hybrid devices depends on the size of the quantum dot and on the nature of the dye.

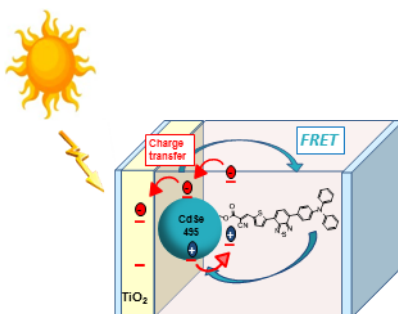

Supplement: c4ta03098b2.pdf [file c4ta03098b2.pdf]
